# Supplementary material for: Fixed or random? On the reliability of mixed-effects models for a small number of levels in grouping variables
Source: bioRxiv or medRxiv preprint supplement (doi:10.1101/2021.05.03.442487), 2021-09-13
Supplement: Supplementary file [file media-1.pdf]

# Supporting Information S1

## Fixed or random? On the reliability of mixed-effect models for a small number of levels in grouping variables

### **1. Mixed-effect model implementations in R, default settings and convergence issues**

The most used packages in R to fit mixed-effect models are lme4 (Bates et al. 2015) and glmmTMB (Brooks et al. 2017). These packages differ in their optimization routines and the calculation of p-values for linear mixed-effect models (LMMs). While lme4 uses standard optimizers, glmmTMB relies on automatic differentiation implemented in TMB package. Another difference is that glmmTMB offers to fit linear and generalized linear models with both the maximum likelihood (MLE) and the restricted maximum likelihood estimation (REML), while lme4 offers only REML for LMMs but not for GLMMs. Due to these different optimization routines glmmTMB and lme4 results could be slightly different, which we analyze in the following.

#### **1.1 Standard deviation estimates and singular fits**

With glmmTMB using REML the estimates of the standard deviations are bimodal with one peak at zero and one peak around the correct value (Fig. S1). When excluding values which presented standard deviation estimates smaller than  $10^{-3}$ , the peak around zero vanishes

20 (Fig. S2). These estimates correspond to singular fits obtained with lme4. Using REML for  
21 generalized mixed-effect models led to a peak around zero and a peak slightly higher than  
22 the correct value (Fig S1b).

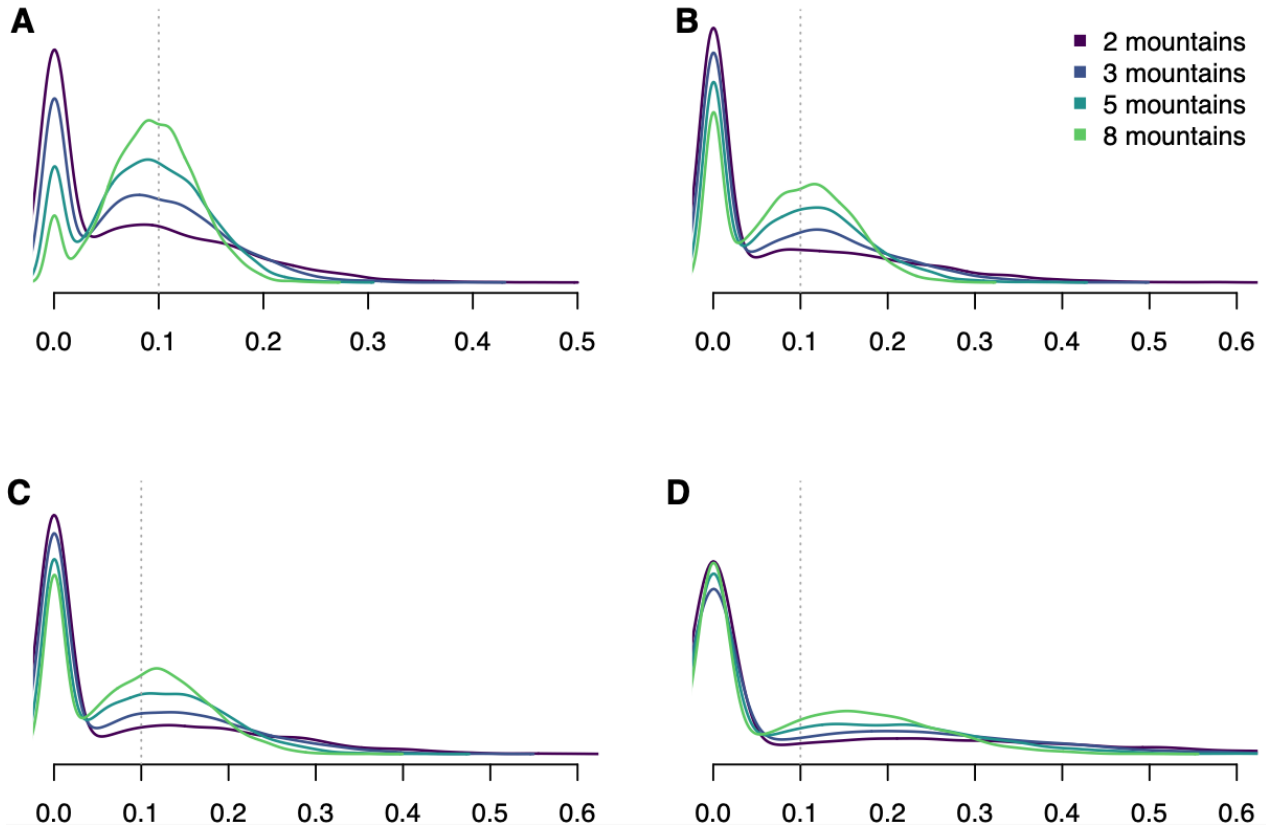

23  
24 **Figure S1:** Standard deviation estimates of the random intercepts (A, C) and random slopes (B, D) for linear  
25 mixed-effect models (A, B) and generalized linear mixed-effect models (C,D) from the correctly specified mixed-  
26 effect model (Table 1. Eq. 10) in Scenario B, fitted with glmmTMB package using REML to simulated data  
27 with 2-8 mountains.. For each scenario, 5,000 simulations and models were tested. The grey lines represent  
28 the true standard deviation used in the simulation (0.1).

29

30

31

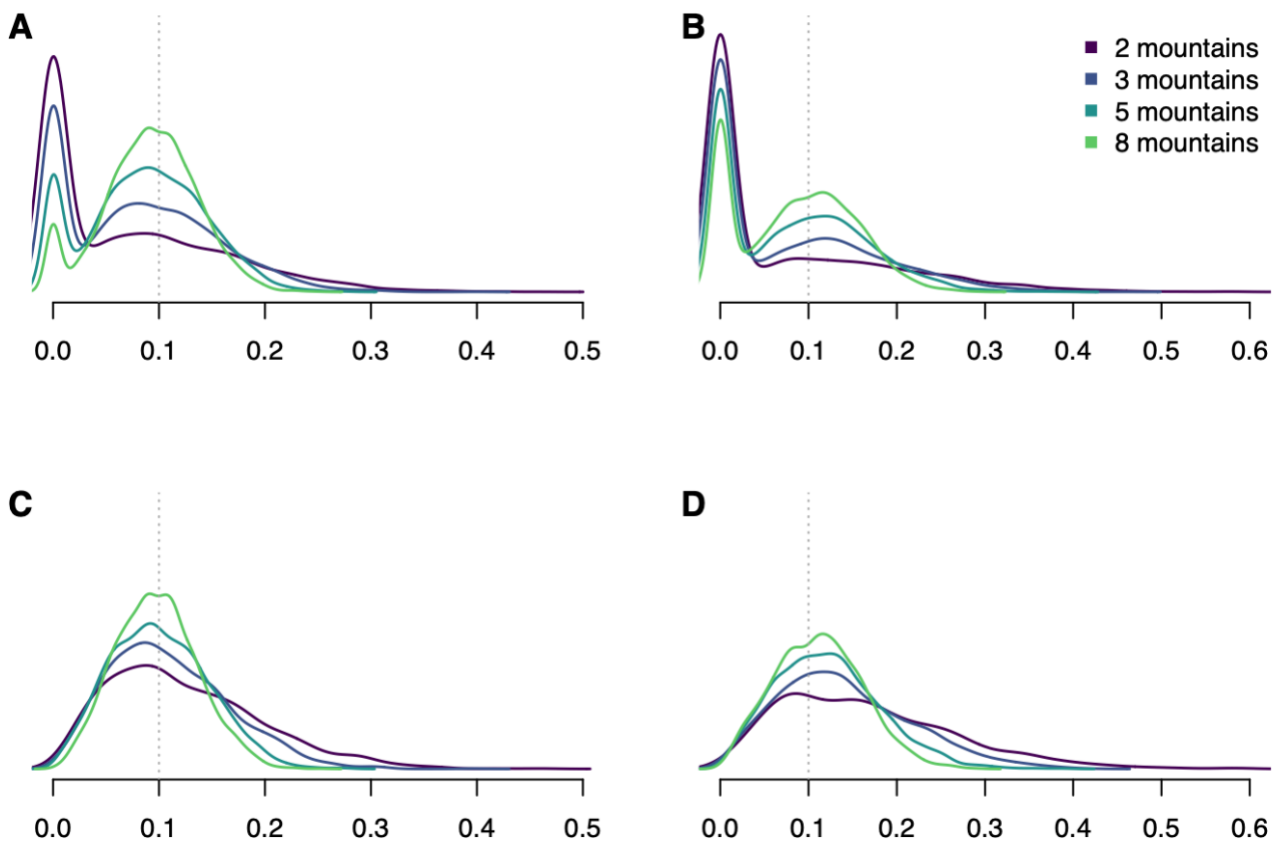

32

33 **Figure S2:** Standard deviation estimates of the random slopes and random intercepts (model 4) for linear  
 34 mixed-effect models (LMM) fitted with *glmmTMB* using REML to simulated data with 2-8 mountains. A and B  
 35 show the results for all models (with and without singular fits), C and D show the results for the models without  
 36 singular fits (standard deviations of  $< 10^{-3}$  were assumed to be singular fits). For each scenario, 5,000  
 37 simulations and models were tested. The grey line represents the true standard deviation used in the simulation  
 38 (0.1).

39 One difference between *lme4* and *glmmTMB* packages that users should be aware of is the  
 40 default fitting algorithm for LMMs and GLMMs. By default, *lme4* uses restricted maximum  
 41 likelihood (REML) for LMMs (*lmer* function) and unrestricted maximum likelihood (MLE) for  
 42 GLMMs (*glmer* function), while *glmmTMB* uses MLE by default for any distribution. Below,  
 43 we compare the distributions of the standard deviations of the random effects (random

44 intercept and slope) of the correctly specified model in scenario B between REML and MLE  
45 using the package glmmTMB, due to its flexibility in fitting models with both algorithms.

46 **Table S1:** Proportion of models ran in **lme4** that presented singular fit convergence problem when using  
47 maximum likelihood (MLE) and restricted maximum likelihood (REML) fitting algorithms. Notice that for GLMMs  
48 in lme4, REML is not implemented.

| Number of groups | LMM  |     | GLMM |
|------------------|------|-----|------|
|                  | REML | MLE | MLE  |
| 2                | 76%  | 89% | 93%  |
| 3                | 61%  | 75% | 86%  |
| 4                | 51%  | 64% | 81%  |
| 5                | 44%  | 56% | 78%  |
| 6                | 38%  | 48% | 76%  |
| 7                | 34%  | 43% | 72%  |
| 8                | 29%  | 38% | 71%  |

49

50 Additional to the number of singular fits a direct comparison of REML and MLE with respect  
51 to their estimates of the standard deviations is necessary to compare their performance.  
52 Irrespective of the specific package (lme4 Fig. S3a or glmmTMB Fig S3b) using MLE for  
53 linear mixed-effect models lead to estimates, which are biased towards zero, while REML  
54 produces estimates, that are around unbiased. For generalized mixed-effect models the  
55 same applies (Fig. S8).

56

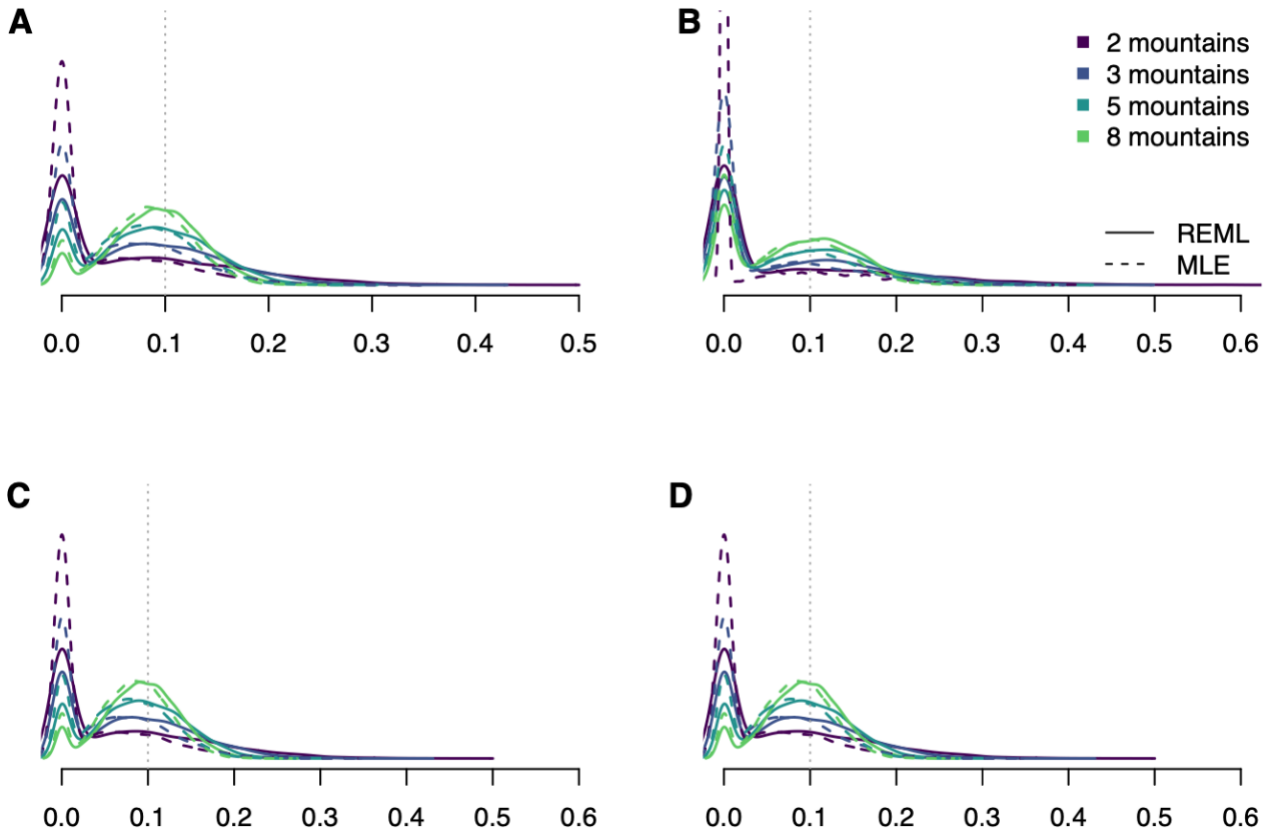

58

59 **Figure S3:** Standard deviation estimates of the random intercepts (A, C) and random slopes (B, D) for **linear mixed-effect**  
 60 **models** (LMM) fitted to simulated data with 2-8 numbers of artificial mountain ranges. For each scenario, 5,000 simulations  
 61 and models were tested. The grey line represents the true standard deviation used in the simulation (0.1). A and B show  
 62 the results for linear mixed-effect models fitted with the *lme4R* package, C and D show the results for linear mixed effects  
 63 models fitted with the *glmmTMB* package. The continuous line shows the results for the models fitted by restricted  
 64 maximum likelihood estimation (REML) and the dotted line shows results for the models fitted by maximum likelihood  
 65 estimation (MLE).

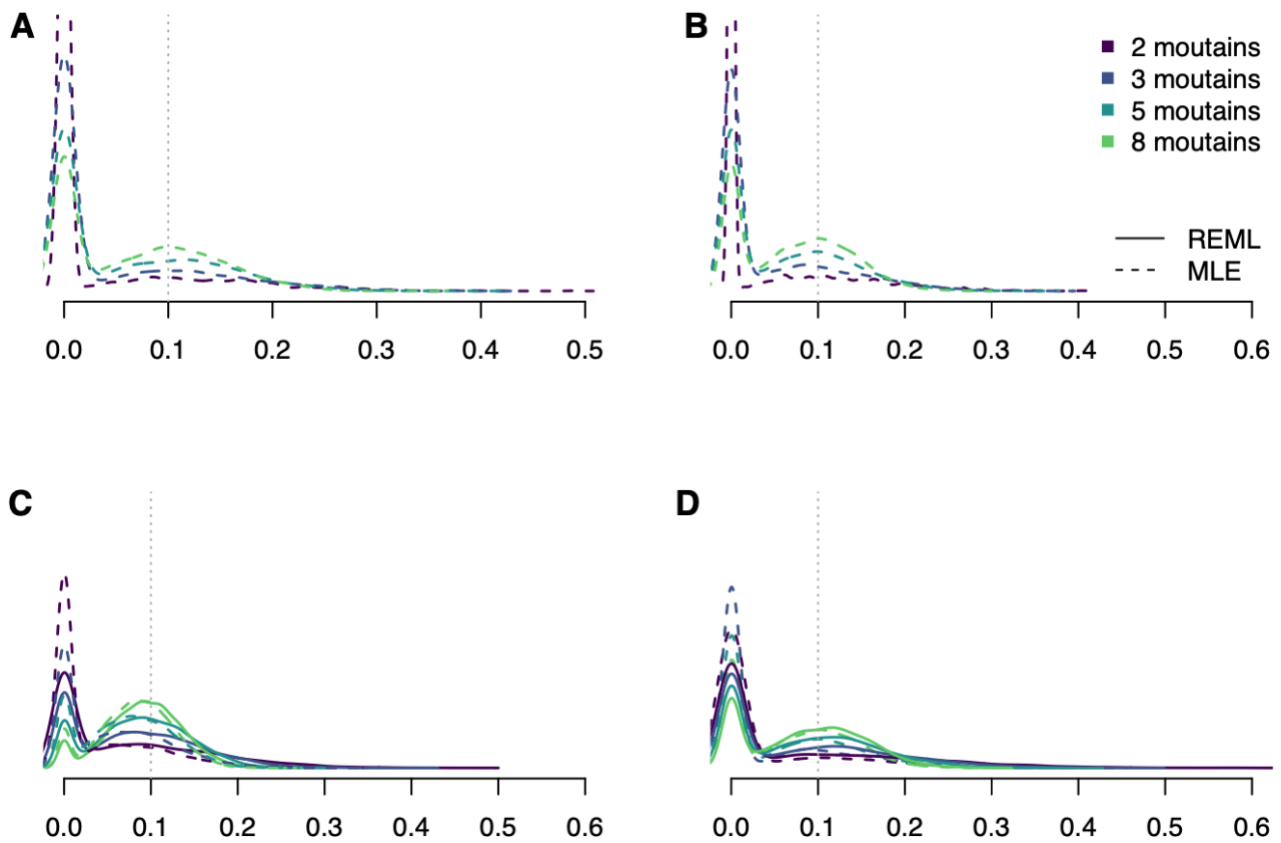

66

67 **Figure S4:** Standard deviation estimates of the random intercepts (A, C) and random slopes (B, D) for **generalized linear**  
 68 **mixed-effect models** (GLMM) and linear regression models fitted to simulated data with 2-8 numbers of artificial mountain  
 69 ranges. For each scenario, 5,000 simulations and models were tested. The grey line represents the true standard deviation  
 70 used in the simulation (0.1). A and B show the results for GLMMs fitted by the lme4 R package, C and D show the results  
 71 for GLMMs fitted by the glmmTMB package. The continuous line represents the results for models fitted by restricted  
 72 maximum likelihood estimation (REML) and the dotted line shows the results for models fitted by maximum likelihood  
 73 estimation (REML).

74

## 75 1.2. p-value calculations for mixed effect models

76 There is also a difference in the calculation of p-values between the two packages. While  
 77 lme4 uses a Satterhwaite approximation to calculate degrees of freedom which then are fed  
 78 into t-statistics, glmmTMB uses z-statistics and thus avoids the calculation of degrees of

79 freedom. For generalized linear models, however, both use z-statistics and do not calculate  
80 degrees of freedom. Z-statistics are the asymptotic limits of t-statistics when having infinite  
81 data, however, these two differ in the low data limit and p-values calculated using z-statistics  
82 are overconfident. We see this for H2 in Scenario A (Fig. S5a), for which t-statistics can be  
83 calculated analytically, and thus t-statistics lead to values around the nominal type I error  
84 rates, while z-statistics lead to increased type I error rates. This also translates into power,  
85 where using z-statistic causes higher, but probably too high power compared to t-statistic  
86 (Fig S5a). For generalized linear mixed-effect models, both packages use z-values and,  
87 thus, present the same statistical properties (Fig. S5b). We speculate the reason why  
88 glmmTMB is using z-statistics also for LMMs is that t-statistics cannot be calculated  
89 analytically for GLMMs and thus have to be approximated anyways. However, when  
90 interpreting the results, it is important to keep in mind that z-statistics are only  
91 approximations in the low data limit. We believe that the power of GLMMs would be similar  
92 to power of LMMs when t-values would be used instead of z-values.

93

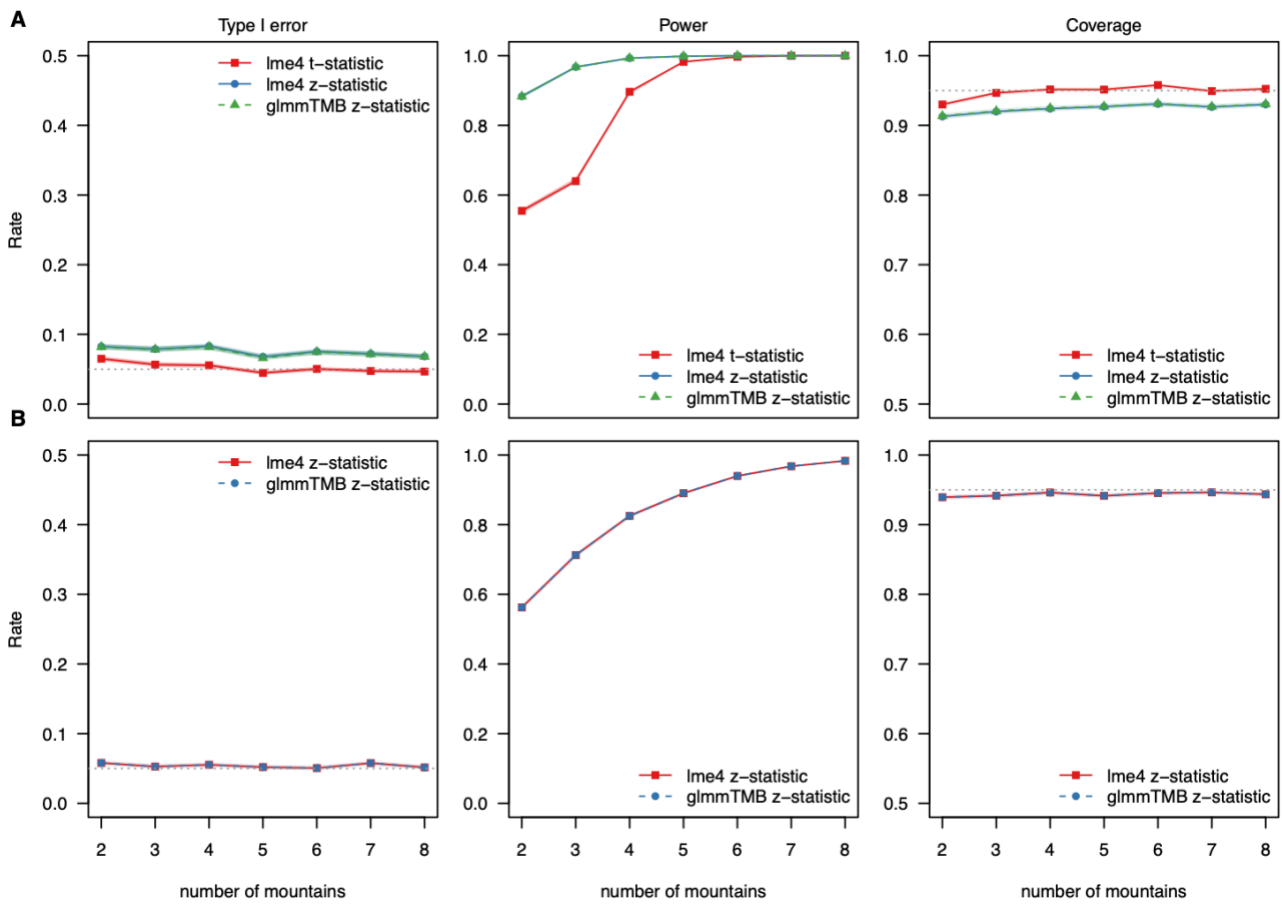

94

95 **Figure S5:** Type I error rates, power, and coverage for linear mixed-effect models (A) and generalized linear mixed-  
 96 effect models (B), fitted to simulated data with 2-8 mountains for scenario B (random intercept and slope for each mountain)  
 97 and 50 (lmm) and 200 (glmm) observations per mountain range. For each scenario, 5,000 simulations and models were  
 98 tested.

99

100 **1.3. Calculation of the mean temperature effect in fixed-effect models with interaction**

101 As fixed-effect models with interactions estimate the effect of one level and its contrasts to  
 102 the other levels, the 'grand mean' effect of temperature itself is not estimated.

103 To calculate the grand mean and its significance, we estimate the grand mean as the  
 104 weighted mean  $\bar{X}$  of the individual level effect estimates  $X_i$  ( $i = 1, \dots, I$  mountains).



105 
$$\bar{X} = w_i * X_i$$

106 with  $w_i = (\sigma_i^2 + \sum_{j=1}^k \sigma_{ij}^2) / (\sum_{i=1}^k \sigma_i^2 + \sum_{i=1}^k \sum_{j(j \neq i)} \sigma_{ij}^2)$ ,

107 where  $\sigma_{ij}$  are the respective components of the covariance matrix of the interaction terms.

108 Since each individual mountain effect is uncertain, it is more difficult to estimate the standard  
109 error for the grand mean temperature effect, but it can be done via uncertainty propagation.

110 With this technique, the variance of the mean effect is composed of two parts. The first part,  
111 accounts for the uncertainty in the estimators of the individual levels and following the rules  
112 of uncertainty propagation (Hughes & Hase 2010) takes the form:

113 
$$\sigma_{\bar{X}}^2 = \left( \sum_{i=1}^k w_i^2 \sigma_i^2 + \sum_{i=1}^k \sum_{j(j \neq i)} w_i w_j \sigma_{ij}^2 \right)$$

114 The second part, which is the averaging of the individual effect estimates has the standard  
115 form of the standard deviation:

116 
$$\sigma_{SD}^2 = \sum_{i=1}^k w_i \frac{(x_i - \bar{x})^2}{k - 1}$$

117 Summing up these two uncertainty contributions, we can calculate the standard error and  
118 thus the p-value for the grand mean temperature effect:

119 
$$SE_{\bar{X}} = \sqrt{\sigma_{\bar{X}}^2 + \sigma_{SD}^2}$$

120

121

## 2. Different standard deviations for the random effects for linear models

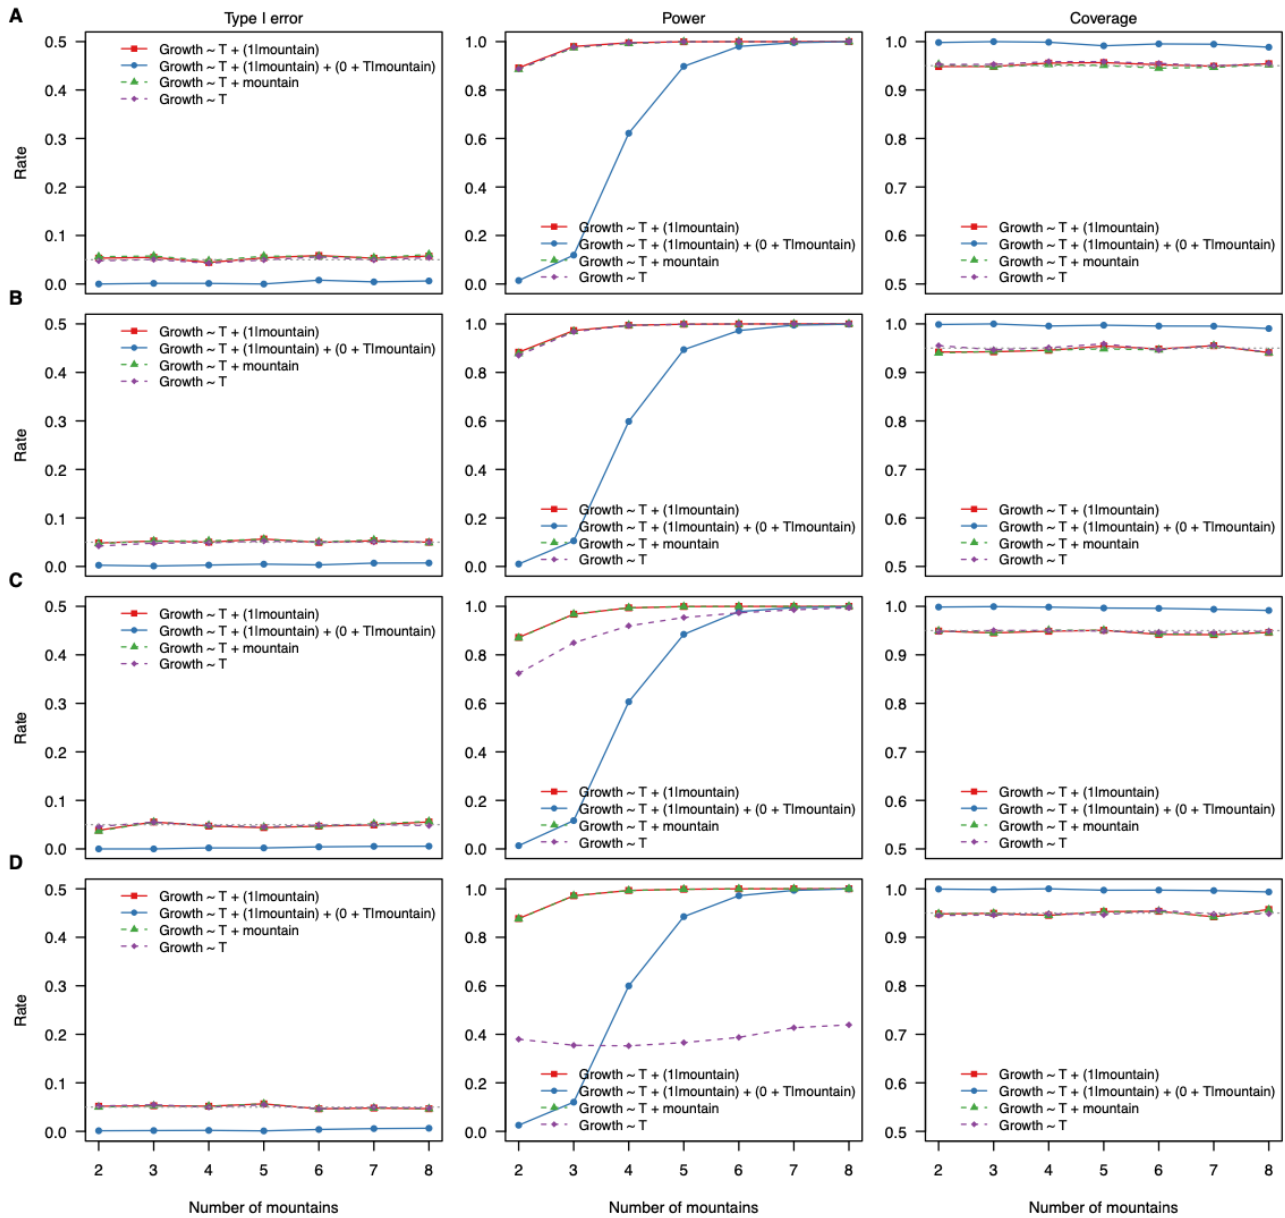

122

123 **Figure S6:** Type I error rates, power, and coverage for linear (mixed effect) models fitted with lme4 to simulated  
124 data with 2-8 mountains for scenario A (random intercept for each mountain) and 50 observations per mountain  
125 range. A-D show the results for different standard deviations of the random effect (0.01,0.1, 0.5 and 2.0). For  
126 each scenario, 5,000 simulations and models were tested.

127

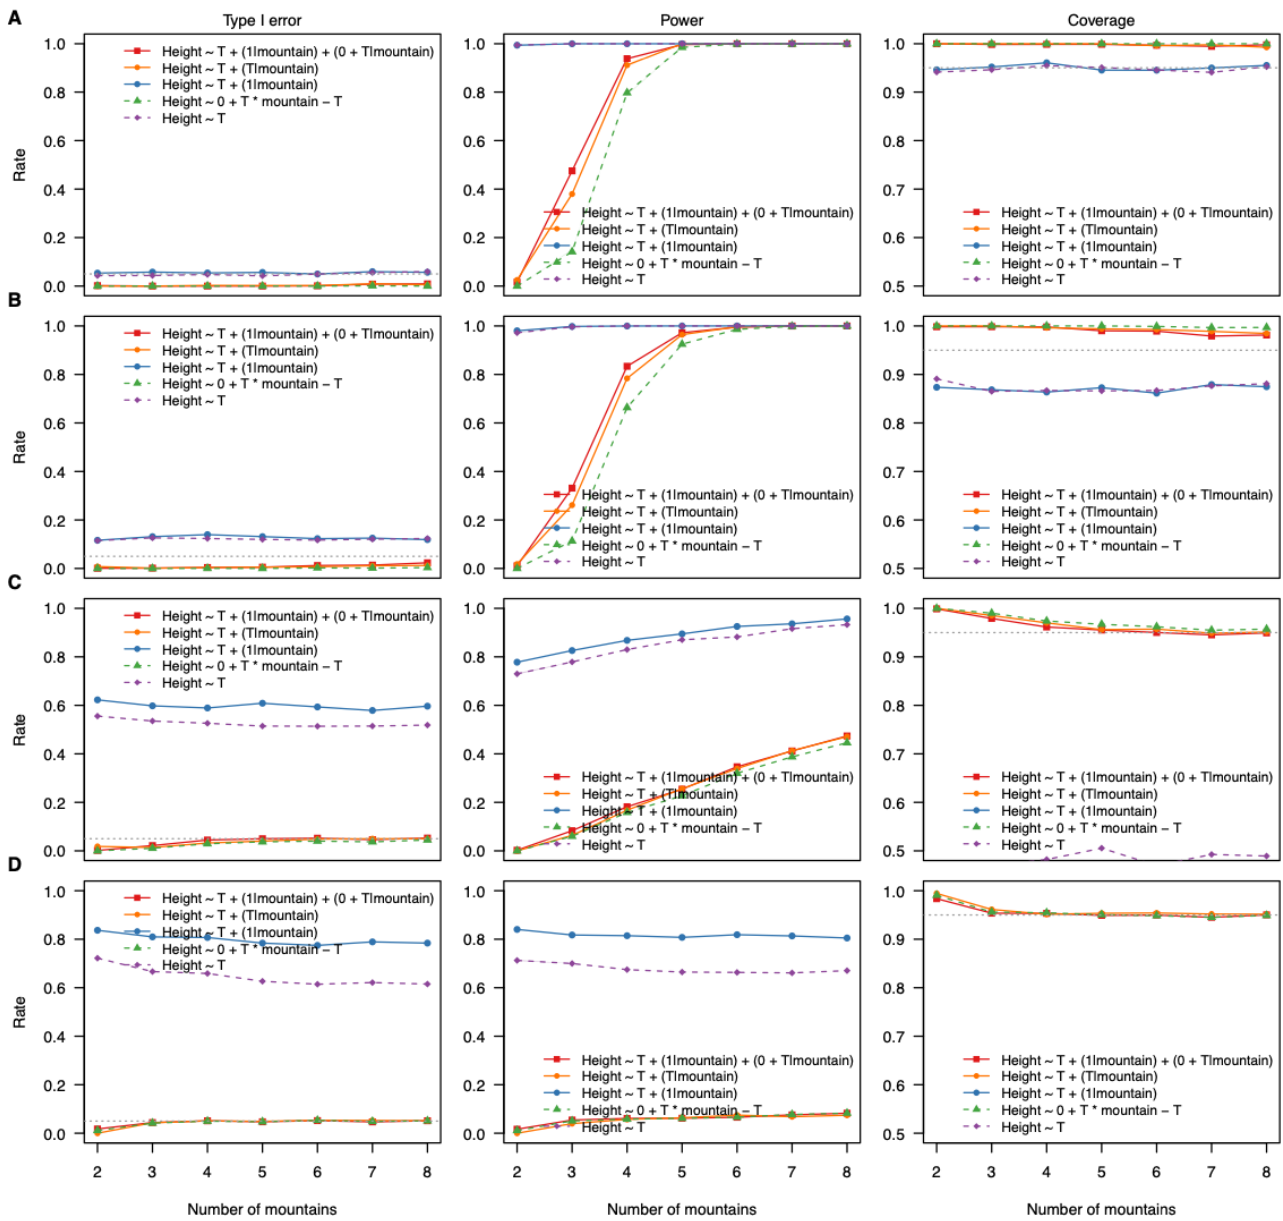

128

129 **Figure S7:** Type I error rates, power, and coverage for generalized linear (mixed effect) models fitted with  
 130 lme4 to simulated data with 2-8 mountains for scenario B (random intercept and random slope for each  
 131 mountain) and 50 observations per mountain range. A-D show the results for different standard deviations  
 132 (0.01,0.1, 0.5 and 2.0). For each scenario, 5,000 simulations and models were tested.

133

134 **3. Influence of sample size on statistical properties**

135 Generalized linear models (mixed or not) with non-gaussian distributions require much more  
136 data to have a high probability to truly detect a significant effect (power). We ran additional  
137 data with different sample sizes per level in the grouping variable (25, 50,100, 200) and  
138 compared type I, power, and coverage for the binomial models (Hypothesis 1, Box 1) in both  
139 scenarios A (Figure S8) and B (Figure S9).

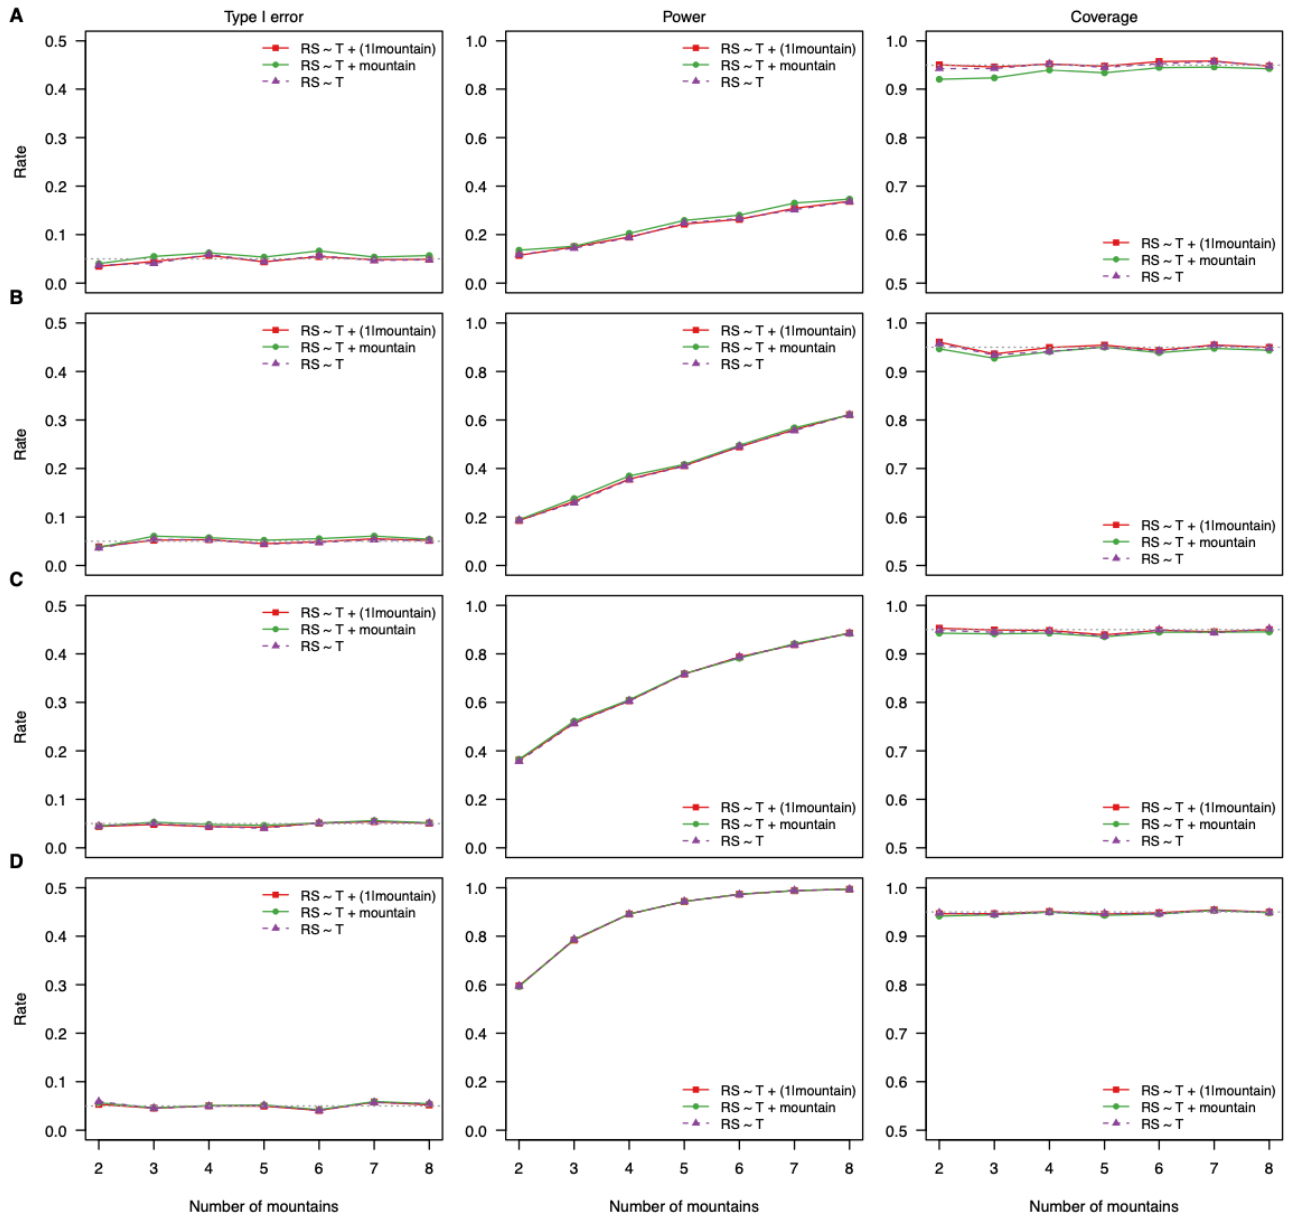

141 **Figure S8:** Type I error rates, power, and coverage for generalized linear (mixed effect) models fitted with  
 142 lme4 to simulated data with 2-8 mountains for scenario A (random intercept for each mountain). A-D show the  
 143 results for different numbers of observations for each mountain (25, 50, 100, and 200). For each scenario,  
 144 5,000 simulations and models were tested.

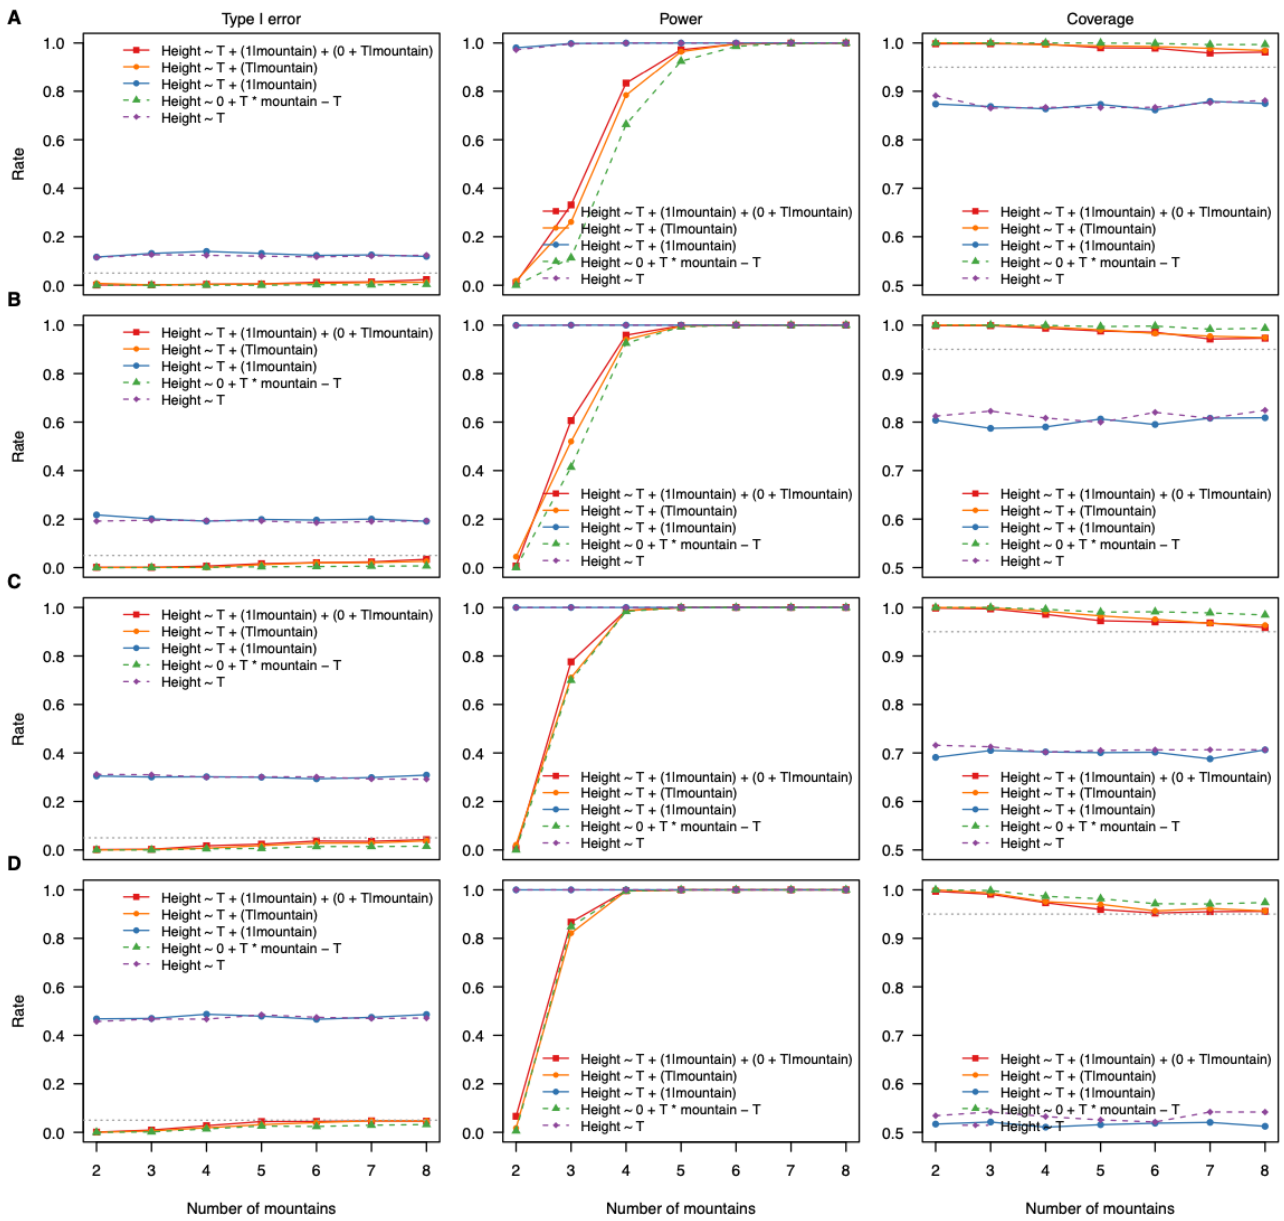

146

147 **Figure S9:** Type I error rates, power, and coverage for linear (mixed effect) models fitted with lme4 to simulated  
 148 data with 2-8 mountains for scenario B (random intercept and slope for each mountain). A-D show the results  
 149 for different numbers of observations for each mountain (50, 100, 200, and 500). For each scenario, 5,000  
 150 simulations and models were tested.

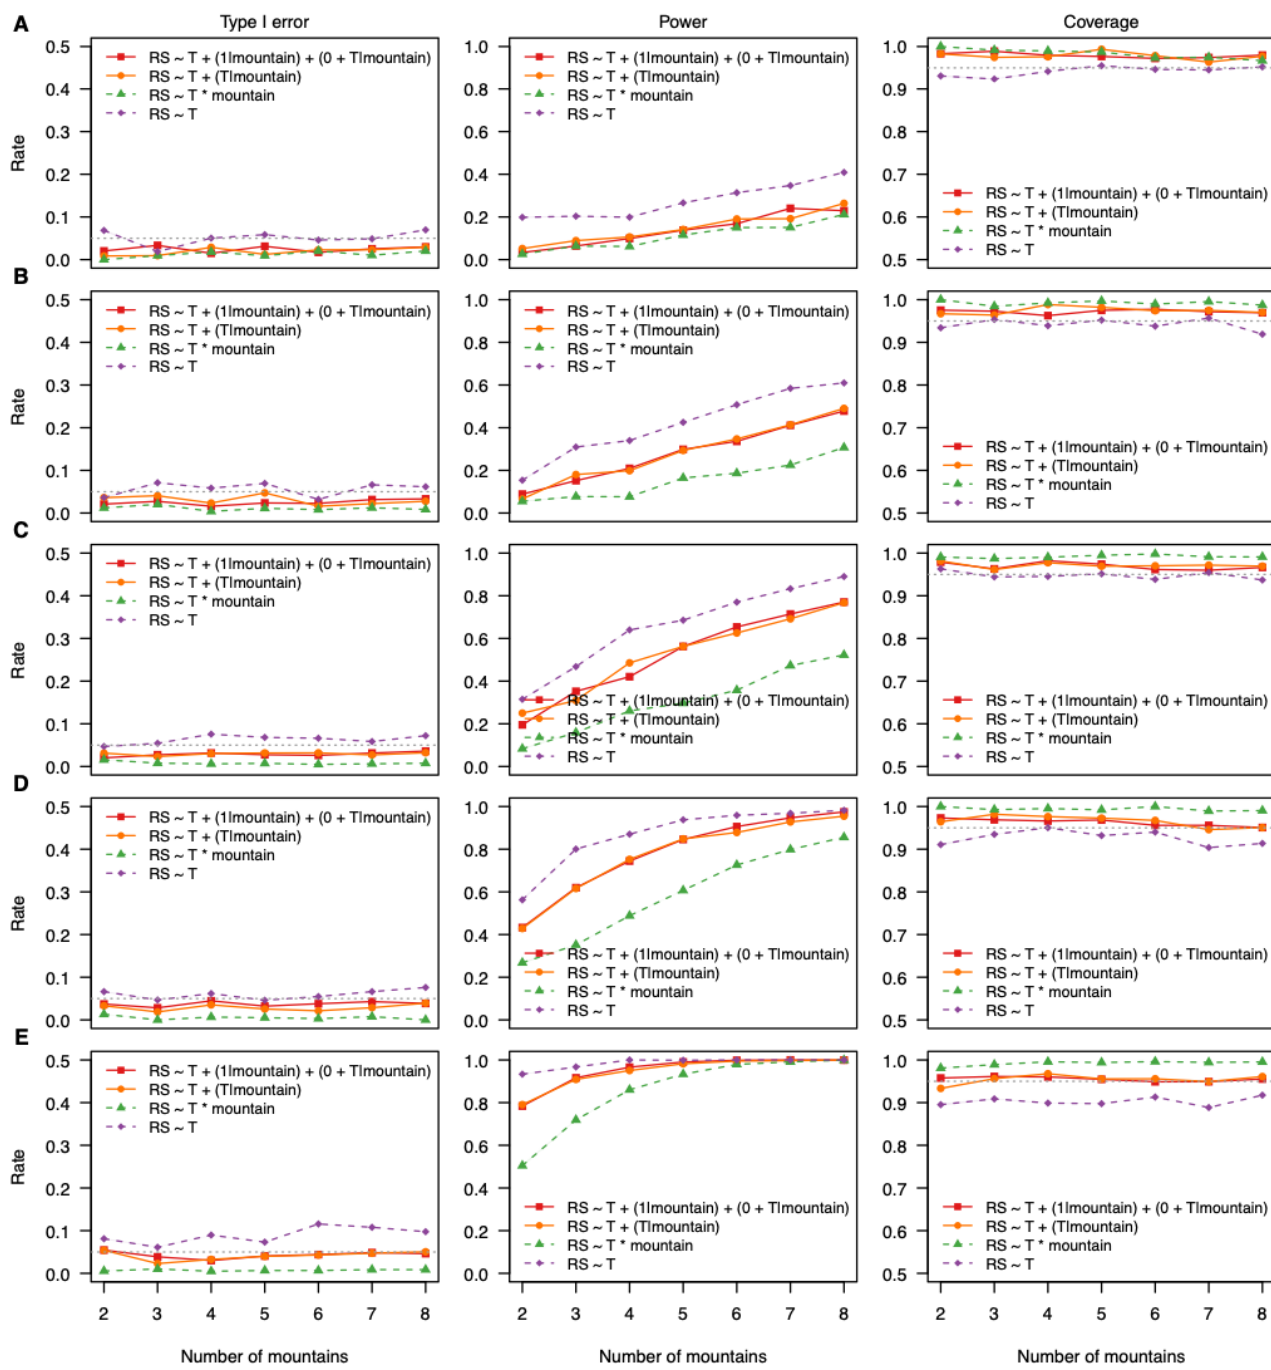

151

152 **Figure S10:** Type I error rates, power, and coverage for generalized linear (mixed effect) models fitted with  
 153 lme4 to simulated data with 2-8 mountains for scenario B(random intercept and slope for each). A-E show the  
 154 results for different numbers of observations for each mountain (25, 50, 100, 200, and 500). For each scenario,  
 155 5,000 simulations and models were tested.
